# Supplementary material
Source: PubMed Central journal article supplement (PMC4169290)
Supplement: NIHMS59794-supplement-2.pdf [file NIHMS59794-supplement-2.pdf]

## **Supplemental Data**

### **Supplementary Tables:**

Supplementary Table 1: List of Antibodies used

Supplementary Table 2: List of Primers for qRT-PCR

**Supplementary Table 1.**

| <b>Antibody</b> | <b>Clone</b> | <b>Source</b>            |
|-----------------|--------------|--------------------------|
| BrdU            |              | BD Biosciences           |
| CD3             | 17A2         | Biolegend                |
| CD11b           | M1/70        | Biolegend                |
| CD11c           | N418         | Biolegend                |
| CD19            | 1D3          | BD Biosciences           |
| CD45            | 30-F11       | Biolegend                |
| CD45.1          | A20          | BD Biosciences/Biolgened |
| CD45.2          | 104          | BD Biosciences/Biolegend |
| CD64            | X54-5/7.1    | Biolegend                |
| CD115           | AFS98        | Biolegend                |
| F4/80           | BM8          | eBioscience              |
| Ki67            | B56          | BD Biosciences           |
| Ly6C            | HK1.4        | eBioscience/Biolegend    |
| Ly6G            | 1A8          | BD biosciences/Biolegend |
| MHC II          | M5/114.15.2  | eBioscience              |
| MerTK           | BAF591       | R&D Systems              |
| Siglec F        | E50-2440     | BD biosciences           |

**Supplementary Table 2.**

| <b>Gene</b>   | <b>Sense</b>                   | <b>Anti-sense</b>          |
|---------------|--------------------------------|----------------------------|
| Cyclophilin A | GTG GTC TTT GGG AAG GTG AA     | TTA CAG GAC ATT GCG AGC AG |
| Il10          | GCT CTT ACT GAC TGG CAT GAG    | CGC AGC TCT AGG AGC ATG TG |
| TNF $\alpha$  | ACC CTC ACA CTC AGA TCA TCT TC | TGG TGG TTT GCT ACG ACG T  |
| Cd163         | CCT TGG AAA CAG AGA CAG GC     | TCC ACA CGT CCA GAA CAG TC |
